# Supplementary material for: Global Longitudinal Strain by Speckle Tracking Echocardiography and Mortality in Septic Patients: an updated systematic review and meta-analysis with trial sequential analysis
Source: Research Square preprint supplement (doi:10.21203/rs.3.rs-3304149/v1), 2023-09-01
Supplement: Supplementary file 1 [file 02846c84d979f77e1dabe4dc.docx]

**ELECTRONIC SUPPLEMENT**

**Global Longitudinal Strain by Speckle Tracking Echocardiography and Mortality in Septic Patients: an updated systematic review and meta-analysis with trial sequential analysis.**

Critical Care

**Pruszczyk Andrzej, Zawadka Mateusz, Andruszkiewicz Pawel, La Via Luigi, Herpain Antoine, Sato Ryota, Dugar Siddharth, Chew Michelle S., Sanfilippo Filippo**

**Corresponding Authors:**

Mateusz Zawadka, [m.t.zawadka@gmail.com](mailto:m.t.zawadka@gmail.com)

**2nd Department of Anesthesiology and Intensive Care, Medical University of Warsaw, Poland**

Filippo Sanfilippo, 00393289178766; [filipposanfi@yahoo.it](mailto:filipposanfi@yahoo.it)

**Department of General Surgery and Medico-Surgical Specialties, School of Anaesthesia and Intensive Care, University of Catania, Catania, Italy.**

**e-Table 1. PICOS criteria**

| PICOS | Characteristics of clinical studies included for the qualitative synthesis and meta-analysis |
| --- | --- |
| 1. Participants | Adult patients with sepsis |
| 1. Intervention | Strain echocardiographic assessment with TTE, conducted within the first 48 h from diagnosis |
| 1. Comparison | Primary: comparison of strain values between survivors and non-survivors  Secondary: comparison of LVEF between survivors and non-survivors (only studies providing Strain)  Sensitivity: excluding studies with high risk of bias, leave-one-out, including studies performing TTE beyond 48h after the diagnosis of sepsis; including retrospective and case-control studies, based on software used for Strain assessment |
| 1. Outcomes | Mortality (at longest follow-up) |
| 1. Study design | Prospective clinical studies |

**e-Table 2. Details on the software version used for GLS and on the approach for LVEF quantification. ASE: American Society of Echocardiography; EACVI: European Association of Cardiovascular Imaging**

| Author, year | Strain software | Method for LVEF quantification |
| --- | --- | --- |
| Bazalgette, 2021 | EchoPAC (GE®) | - |
| Bendary, 2022 | Image Arena (TomTec) | As recommended by ASE |
| Boissier, 2017 | Philips’ Qlab 8.1 (Philips®) | Simpson’s method |
| Chang, 2015 | EchoPAC v. BT09 (GE®) | As recommended by ASE |
| de Braga L. C. Canesso, 2019 | EchoPAC (GE®) | As recommended by ASE/EACVI |
| De Geer, 2014 | EchoPac v. 112 (GE®) | Modified Simpson’s method |
| Ehrman 2022 | EchoPAC (GE®) | LVEF assessed by visual estimation in increments of 5% |
| Hai, 2020 | EchoPac v. 112 | Modified Simpson’s method |
| Innocenti, 2021 | Philips’ Qlab 8.1 (Philips®) | Simpson’s method |
| Landesberg, 2014 | Philips’ Qlab 8.1 (Philips®) | Modified Simpson’s method |
| Lanspa, 2021 | TomTec | As recommended by ASE |
| Orde, 2014 | Syngo Velocity Vector Imaging (Siemens®) | As recommended by ASE |
| Ricarte-Bratti, 2017 | Echo Pac v. 113 (GE®) | As recommended by ASE |
| Shahul, 2015 | Cardiac perf. Analysis v1.1 (TomTec®) | Simpson’s method |

**e-Figure 1. Forest plot comparing left ventricular global longitudinal strain (GLS) values between survivors and non-survivors among septic patients, with subgroup analysis according to the number of views used to calculate GLS values. CI: Confidence Interval; IV: inverse variance; SD: standard deviation.**

**
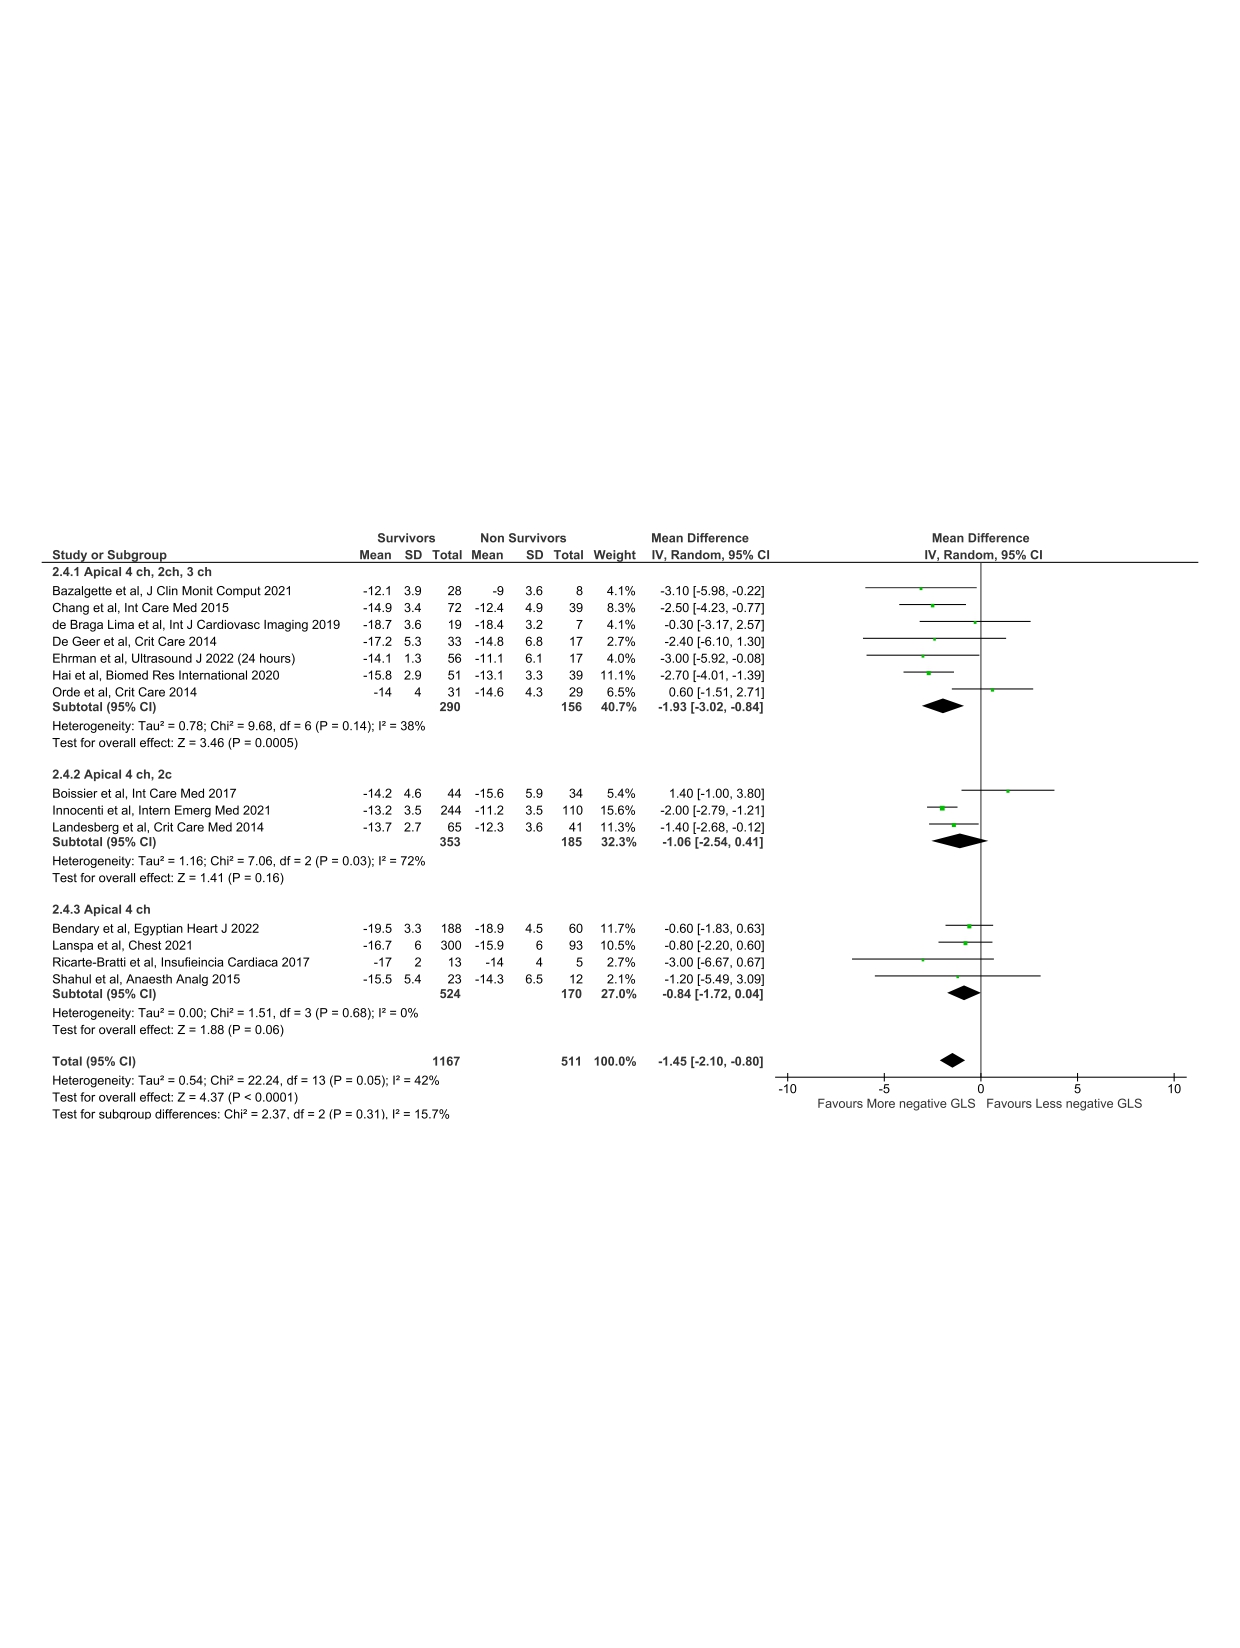
**

**e-Figure 2. Forest plot comparing left ventricular global longitudinal strain (GLS) values between survivors and non-survivors among septic patients, with subgroup analysis according to the criteria used to diagnose septic patients. CI: Confidence Interval; IV: inverse variance; SD: standard deviation.**

**
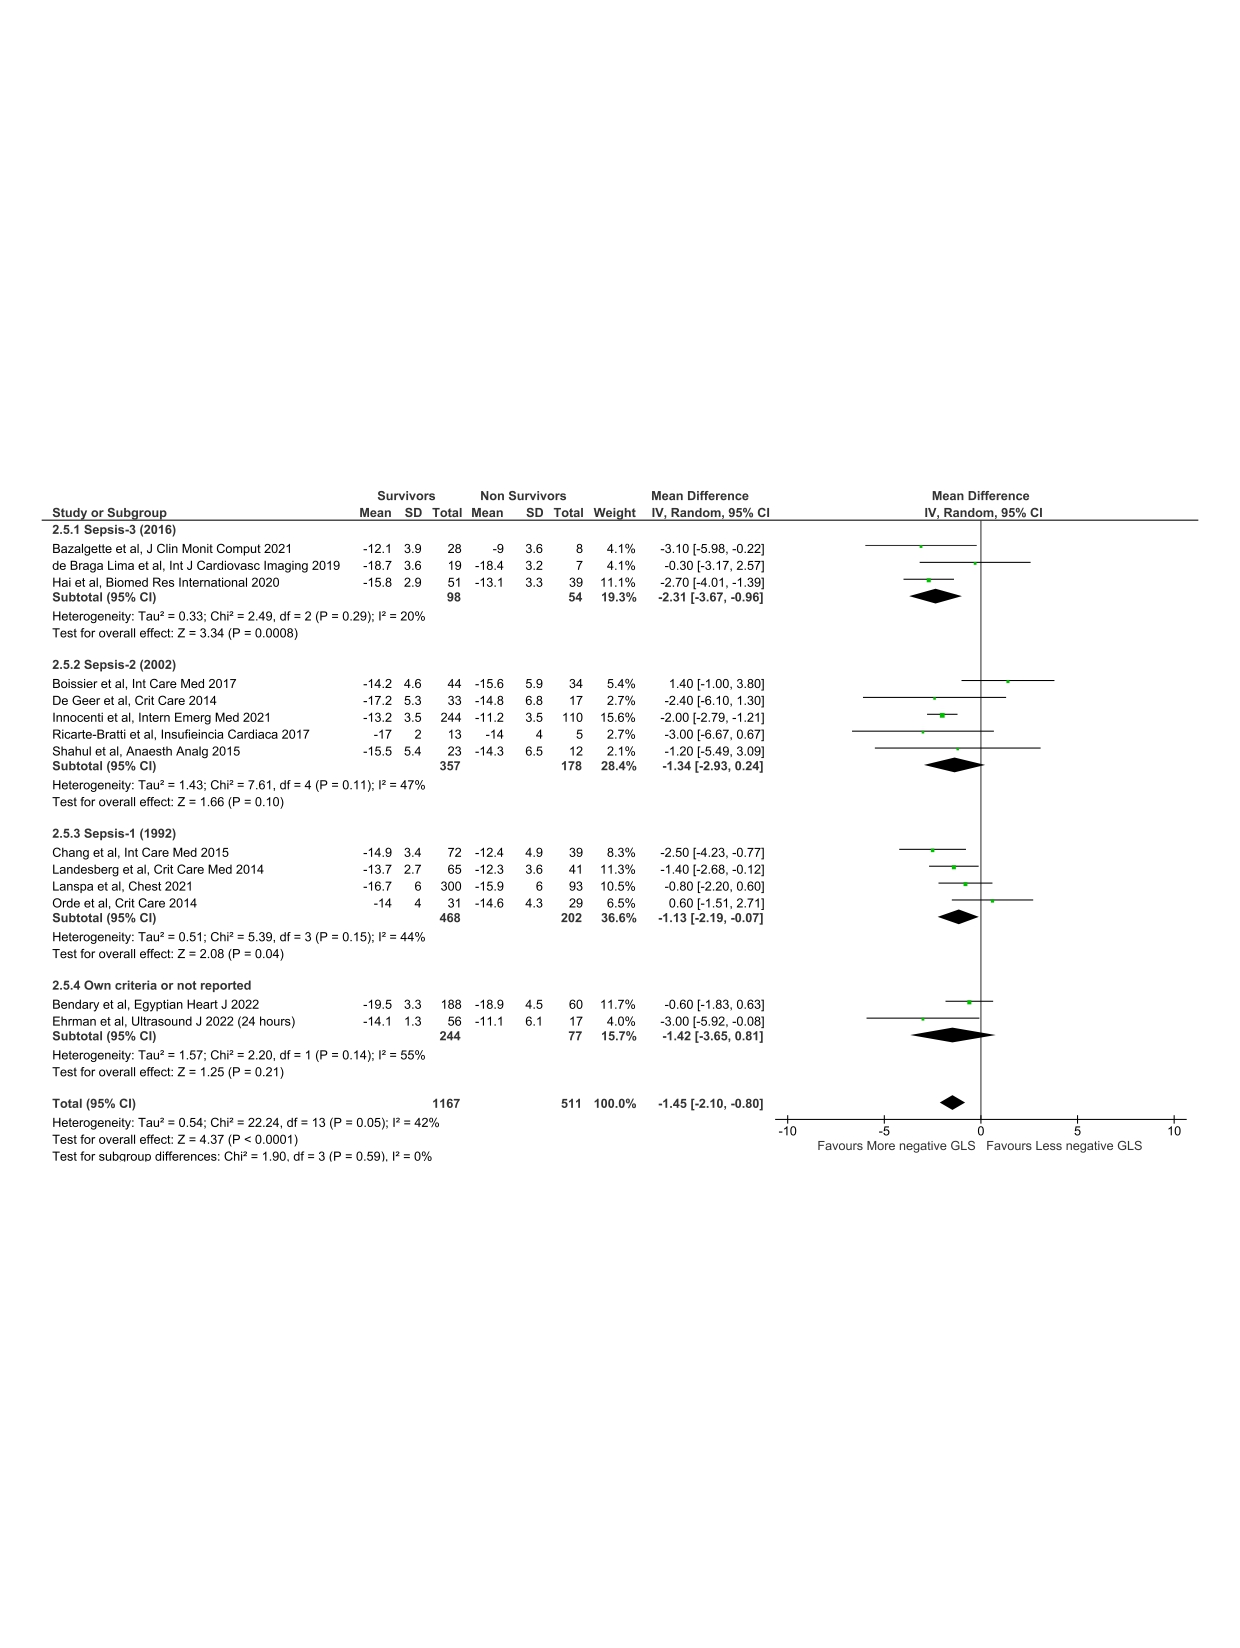
**

**e-Figure 3. Forest plot comparing left ventricular global longitudinal strain (GLS) values between survivors and non-survivors among septic patients, with subgroup analysis separating studies according to the presence of septic shock only or of all stages of septic disease. CI: Confidence Interval; IV: inverse variance; SD: standard deviation.**

**
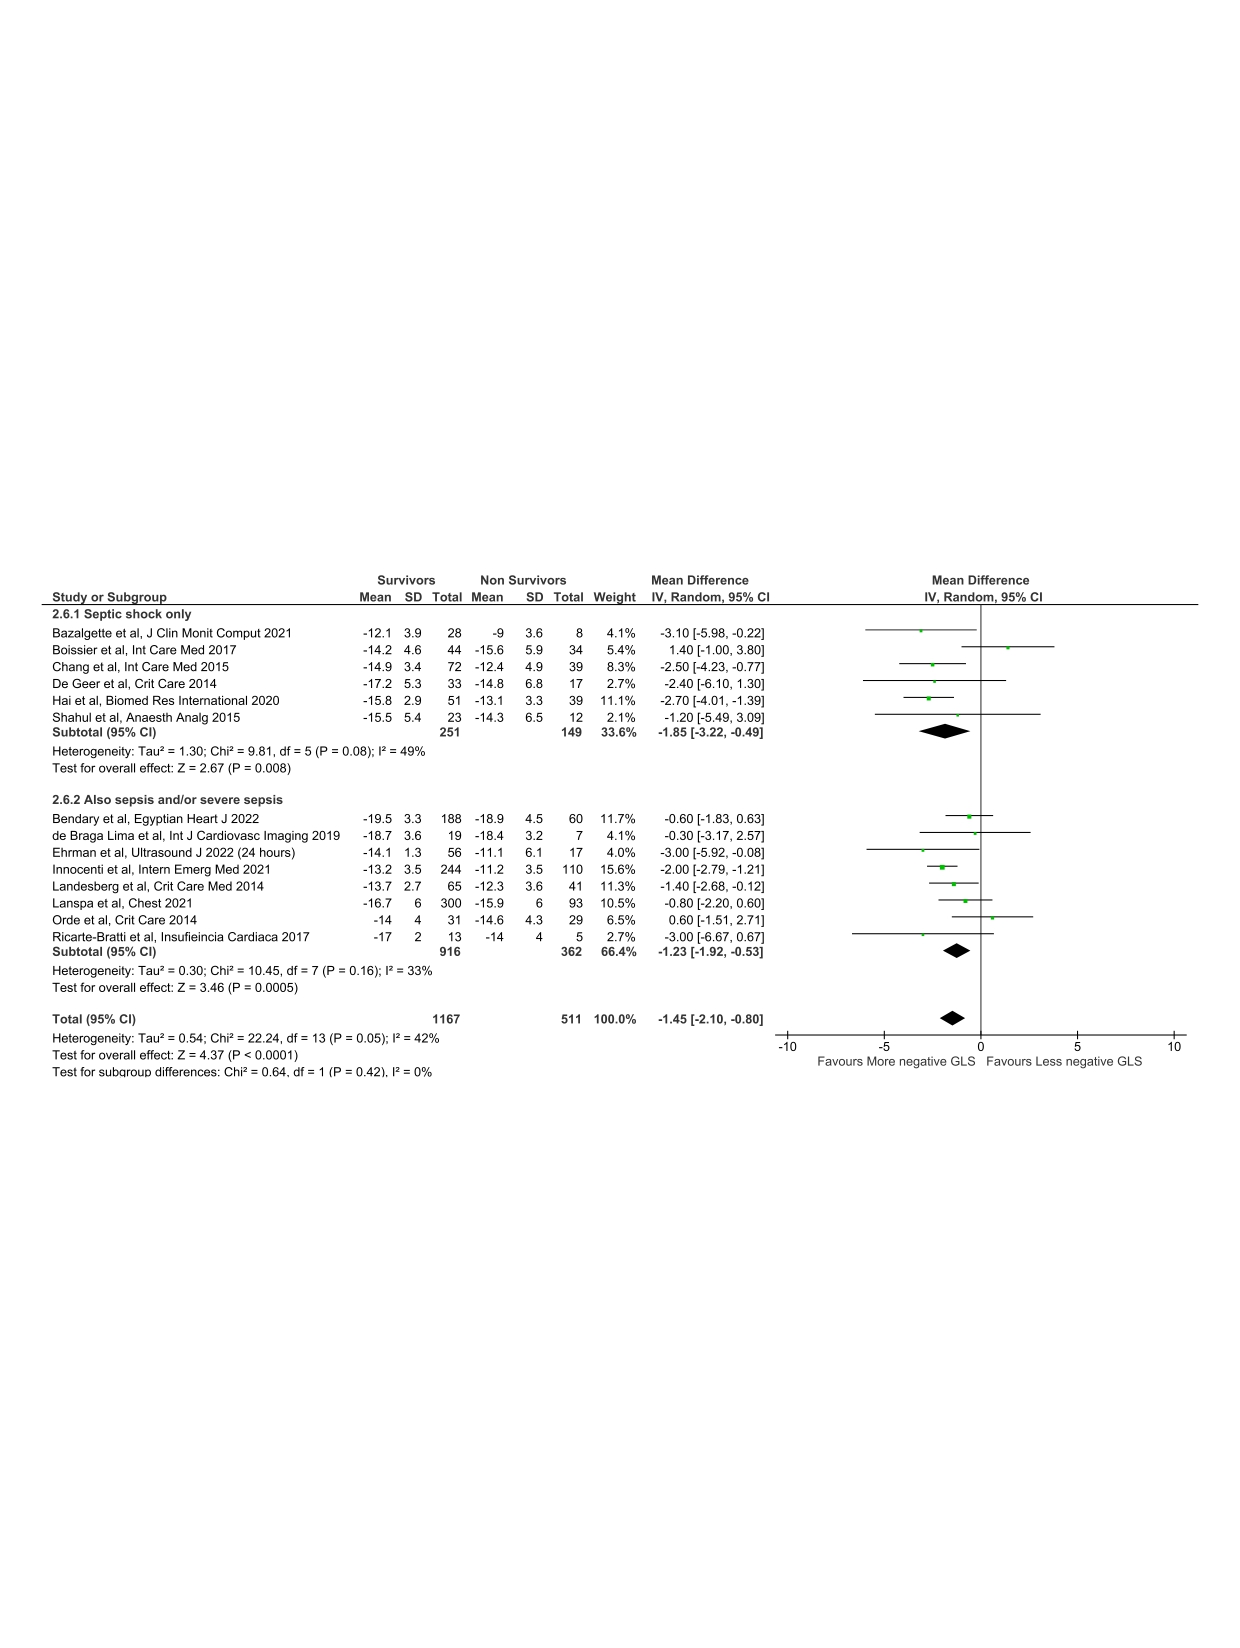
**

**e-Figure 4. Funnel plot inspection for the primary analysis of the GLS**


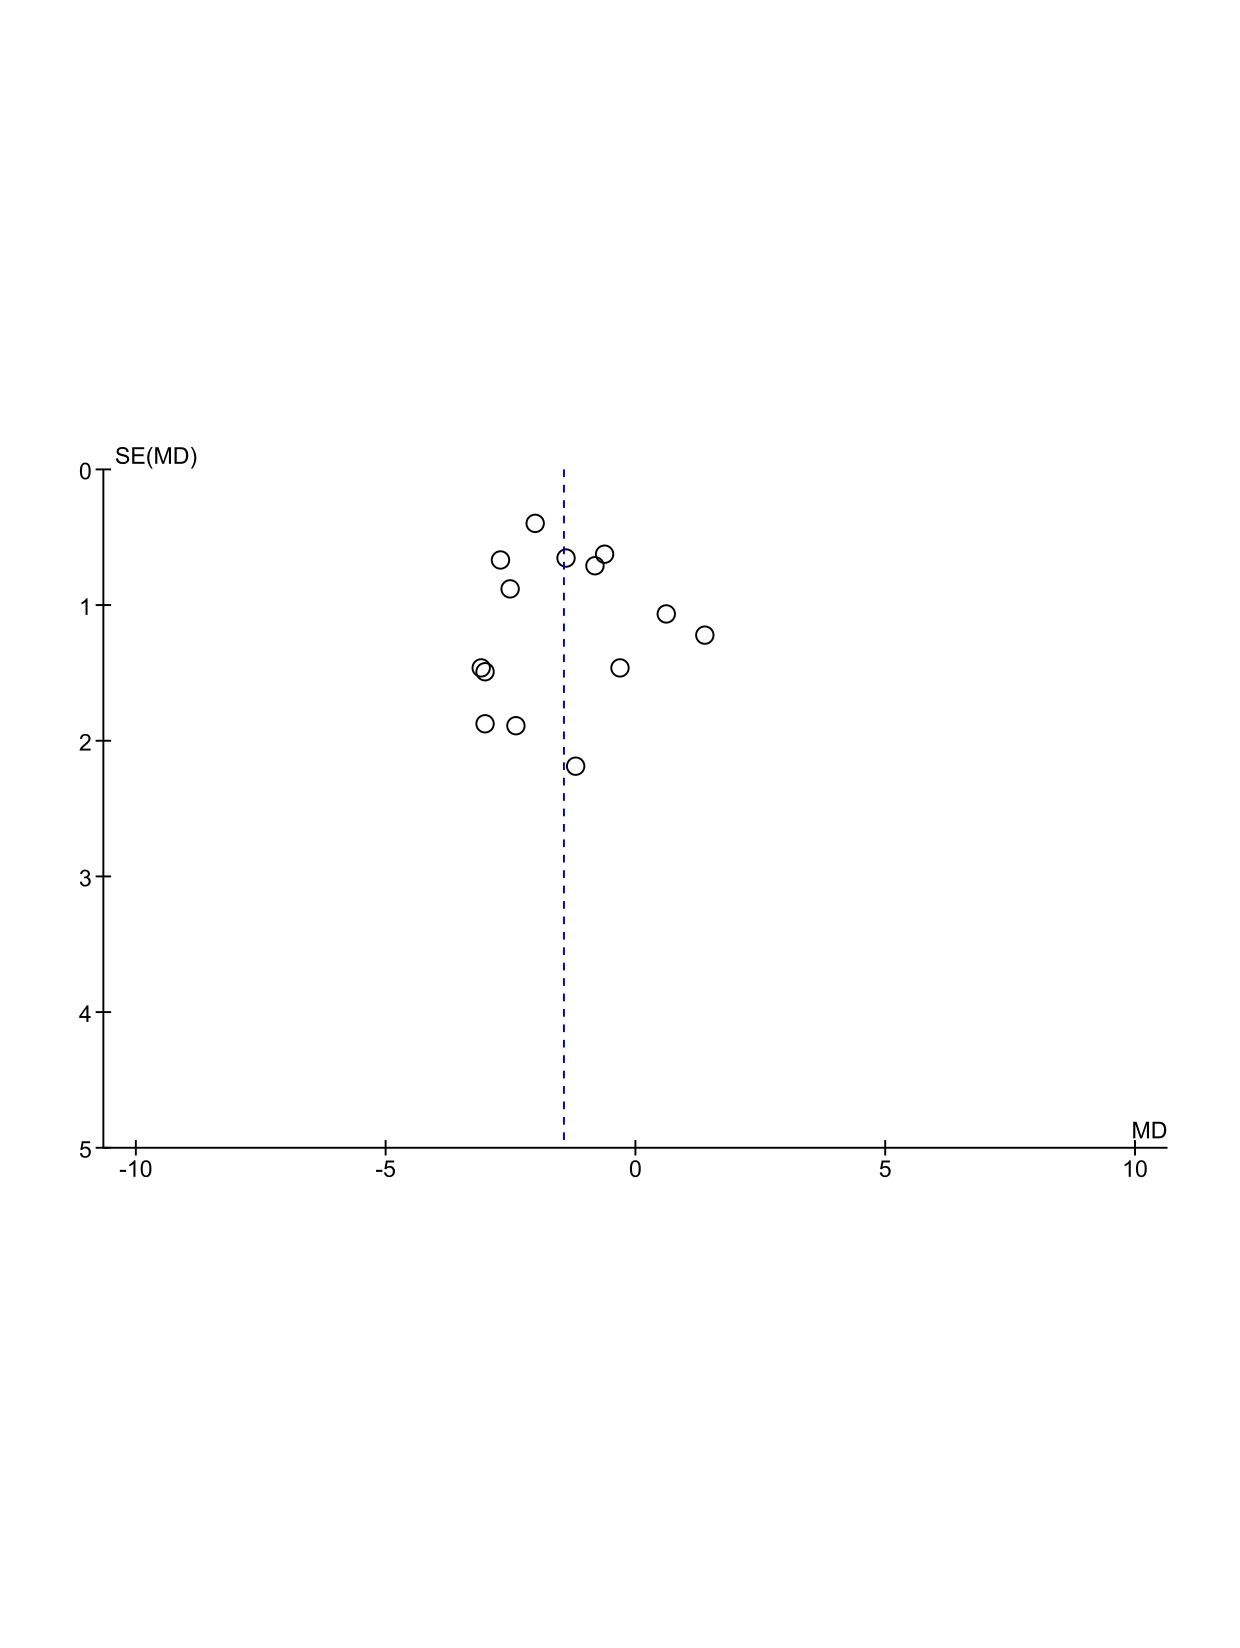


e-Table 3. Newcastle-Ottawa Scale assessment of quality of included cohort studies. Each asterisk represents fulfillment of the acceptable criteria within each subsection

| **Study** | **Selection** | | | | **Comparability** | **Outcomes** | | | **Total** |
| --- | --- | --- | --- | --- | --- | --- | --- | --- | --- |
| Representativeness of exposed cohort | Selection of nonexposed cohort | Ascertainment of exposure | Outcome not present at the start of the study |  | Assessment of outcomes | Length of follow-up | Adequacy of follow-up |  |
| **Acceptable Criteria** | Sepsis with criteria well-defined and following established guidelines.  Consecutive patients enrolled. | Same with exposed cohort. | Blinded assessment and reporting interobserver repeatability | Echocardiography was performed after the diagnosis of sepsis. | *: Adjusting for age or sex.  *: additional factors including severity score, past medical conditions, fluid status, or vasopressor dose. | Secured records / Electronic medical records | At least 28 days or in-hospital mortality. | Reporting whether there was a loss of follow-up. If any, it was below 10% of the cohort? |  |
| **Bendary 2022** | - | * | - | * | - | * | * | * | 5 |
| **Ehrman 2022** | - | - | - | * | - | * | * | * | 4 |
| **Bazalgette 2021** | * | * | - | * | - | * | * | * | 6 |
| **Innocenti 2021** | * | * | - | * | - | * | * | * | 6 |
| **Lanspa 2021** | - | * | - | * | - | * | * | * | 5 |
| **Hai 2020** | * | * | - | * | - | * | * | * | 6 |
| **De Braga Lima 2019** | - | * | - | * | - | * | * | * | 3 |
| **Boissier 2017** | * | * | - | * | - | * | * | * | 6 |
| **Ricarte-Bratti 2017** | - | * | - | * | - | * | * | * | 5 |
| **Chang 2015** | - | * | * | * | - | * | * | * | 6 |
| **De Geer 2015** | - | * | - | * | - | * | * | * | 5 |
| **Shahul 2015** | * | * | - | * | - | - | * | * | 6 |
| **Landesberg 2014** | * | * | - | * | - | * | * | * | 6 |
| **Orde 2014** | - | * | - | * | - | * | * | * | 5 |
